# Supplementary material for: Reduced Potential Barrier of Sodium-Substituted Disordered Rocksalt Cathode for Oxygen Evolution Electrocatalysts
Source: MDPI journal article supplement (doi:10.3390/nano13010010), 2022-12-20
Supplement: s1 [file s1]

Supplementary Information for

**Reduced Potential Barrier of Sodium-substituted Disordered Rocksalt Cathode for Oxygen Evolution Electrocatalysts**

Aditya Narayan Singh<sup>1</sup>, Amir Hajibabaei<sup>2</sup>, Miran Ha<sup>2</sup>, Abhishek Meena<sup>3</sup>, Hyun-Seok Kim<sup>4</sup>, Chinna Bathula<sup>4\*</sup>, Kyung-Wan Nam<sup>1, 5,\*</sup>

<sup>1</sup>Department of Energy and Materials Engineering, Dongguk University-Seoul, Seoul 04620, Republic of Korea

<sup>2</sup>Center for Superfunctional Materials, Department of Chemistry, Ulsan National Institute of Science and Technology (UNIST), 50, UNIST-gil, Ulsan 44919, Republic of Korea

<sup>3</sup>Division of Physics and Semiconductor Science, Dongguk University-Seoul, Seoul 04620, Republic of Korea

<sup>4</sup>Division of Electronics and Electrical Engineering, Dongguk University–Seoul, Seoul 04620, Republic of Korea

<sup>5</sup>Center for Next Generation Energy and Electronic Materials, Dongguk University-Seoul, Seoul 04620, Republic of Korea

\* Correspondence: cdbathula@dongguk.edu (C.D.); knam@dongguk.edu (K.-W.N.)

**Table S1.** The ICP-OES results of synthesized powders. The data shows the number of atoms per mole of material. The ICP-OES data were taken several times and the best data obtained are presented here with a round off to the nearest two decimal places. The data in parentheses () denotes the theoretical values.

| <b>Samples</b> | <b>Li</b>   | <b>Ru</b>  | <b>Ni</b>  | <b>Na</b>  |
|----------------|-------------|------------|------------|------------|
| <b>1</b>       | 1.22 (1.23) | 0.61(0.61) | 0.16(0.16) | /          |
| <b>2</b>       | 1.22 (1.23) | 0.61(0.61) | 0.10(0.11) | 0.05(0.05) |

**Table S2.** A comparative chart for overpotential ( $\eta$ ) of cathode materials used as OER electrocatalyst.

| Catalysts                                                                                                  | $\eta$ @ 10 mA cm <sup>-2</sup><br>(mV) | Condition<br>(Electrolyte) | Refs.     |
|------------------------------------------------------------------------------------------------------------|-----------------------------------------|----------------------------|-----------|
| <b>2</b>                                                                                                   | 270                                     | 1.0M KOH                   | this work |
| <b>1</b>                                                                                                   | 296                                     | 1.0M KOH                   | this work |
| LiCo <sub>0.8</sub> Fe <sub>0.2</sub> O <sub>2</sub>                                                       | 340                                     | 0.1M KOH                   | 1         |
| LiCoO <sub>2</sub>                                                                                         | 430                                     | 0.1M KOH                   | 1         |
| LiCo <sub>0.33</sub> Ni <sub>0.33</sub> Fe <sub>0.33</sub> O <sub>2</sub>                                  | 420                                     | 0.1M KOH                   | 2         |
| LiNi <sub>0.8</sub> Fe <sub>0.2</sub> O <sub>2</sub>                                                       | 302                                     | 0.1M KOH                   | 3         |
| Li <sub>0.7</sub> Co <sub>0.75</sub> Fe <sub>0.25</sub> PO <sub>4</sub>                                    | 390                                     | 6.0M KOH                   | 4         |
| Ni <sub>30</sub> Fe <sub>7</sub> Co <sub>20</sub> Ce <sub>43</sub> O <sub>x</sub>                          | 370                                     | 1.0M KOH                   | 5         |
| Ni <sub>0.9</sub> Fe <sub>0.1</sub> O <sub>x</sub>                                                         | 340                                     | 1.0M KOH                   | 6         |
| NiCo LDH NSs                                                                                               | 370                                     | 1.0M KOH                   | 7         |
| Co <sub>2</sub> V <sub>2</sub> O <sub>7</sub> /VN                                                          | 320                                     | 1.0M KOH                   | 8         |
| c-CoMn <sub>2</sub> /C                                                                                     | 560                                     | 0.1M KOH                   | 9         |
| NiCo LDH NSs/CP                                                                                            | 370                                     | 1.0M KOH                   | 7         |
| NiCo <sub>2</sub> O <sub>4</sub> ultrathin NSs                                                             | 320                                     | 1.0M KOH                   | 10        |
| Ni-doped NW Co <sub>3</sub> O <sub>4</sub> /TF                                                             | 370                                     | 1.0M NaOH                  | 11        |
| Ba <sub>0.5</sub> Sr <sub>0.5</sub> Co <sub>0.8</sub> Fe <sub>0.2</sub> O <sub>3-<math>\delta</math></sub> | 350                                     | 0.1M KOH                   | 12        |
| Ni <sub>0.75</sub> V <sub>0.25</sub> -LDH                                                                  | 320                                     | 1.0M KOH                   | 13        |
| NiCo <sub>2</sub> O <sub>3</sub> @OMC                                                                      | 281                                     | 1.0M KOH                   | 14        |
| Amorphous CoFeO <sub>x</sub>                                                                               | 490                                     | 0.1M KOH                   | 15        |
| CoV <sub>1.5</sub> Fe <sub>0.5</sub> O <sub>4</sub>                                                        | 300                                     | 0.1M KOH                   | 16        |
| Ni/Mo <sub>2</sub> C-NCNFs                                                                                 | 288                                     | 1.0M KOH                   | 17        |
| (Pr <sub>0.5</sub> Ba <sub>0.5</sub> )CoO <sub>3-<math>\delta</math></sub>                                 | 350                                     | 0.1M KOH                   | 18        |
| V-doped NiS <sub>2</sub>                                                                                   | 290                                     | 1.0M KOH                   | 19        |
| RuO <sub>2</sub>                                                                                           | 398                                     | 1.0M KOH                   | 20        |
| IrO <sub>2</sub>                                                                                           | 343                                     | 1.0M KOH                   | 21        |

## Supplementary discussions:

### S1. Effect of Na-doping on binding energy

Chemical doping of the elements in their trace amounts is a followed trend to obtain tailor-made electrocatalysts for water splitting.<sup>22</sup> To highlight the impact of Na-doping in **2**, their core-level spectra have been explained in **Figure 1b-f**. Few other essential aspects will be discussed here. Doping with Na results in surplus oxygen which can catalyze the OER. As the surface oxygen plays a significant role in determining the reaction kinetics in OER, the availability of some of the loosely bound surface oxygen's in **2** (5.45 eV) compared to **1** (6.51 eV) accentuates the facile diffusion of O<sub>2</sub> gas consistent with the experiment data (**Figure 3b and S3**). The XPS data from oxygen 1s core-level spectra for carbonate/hydroxides/oxyhydroxides species (CO<sub>3</sub><sup>2-</sup>/OH<sup>-</sup>/OOH: BE ~531.48 eV) in **2** is much lower than **1**(~531.7 eV), further supports that surface oxygen in **2** are loosely bound and can quickly diffuse during the reaction. Remember here that these species (OH<sup>-</sup>/OOH\*, where \* denotes the active sites of catalyst) are the absorbed intermediate and rate-determining species in OER.<sup>23</sup> The presence of these intermediates in **2** further supports better reaction kinetics against **1**.

## S2. Structural characterizations

As the morphology of the particle largely influences the activity of several electrocatalytic reactions, including OER,<sup>24</sup> the detailed analysis of their shape becomes vital. As can be seen in **Figure 2a**, the particles in **2** have faceted structures. These faceted structures are believed to facilitate better reaction surface for accommodating the reaction intermediate<sup>25</sup>, thus improving the overall reaction kinetics. These faceted structures can be seen decorated by small-sized particles, which are beneficial in providing better connectivity between particle-to-particle and improving the electrical conductivity.<sup>26</sup> Besides, these decorations also make the surface rough and make percolation of electrolyte through a larger exposed surface, thereby increasing OER, which are predominantly surface-dependent reactions. On the contrary, no such features are available in **1** (**Figure S2**).

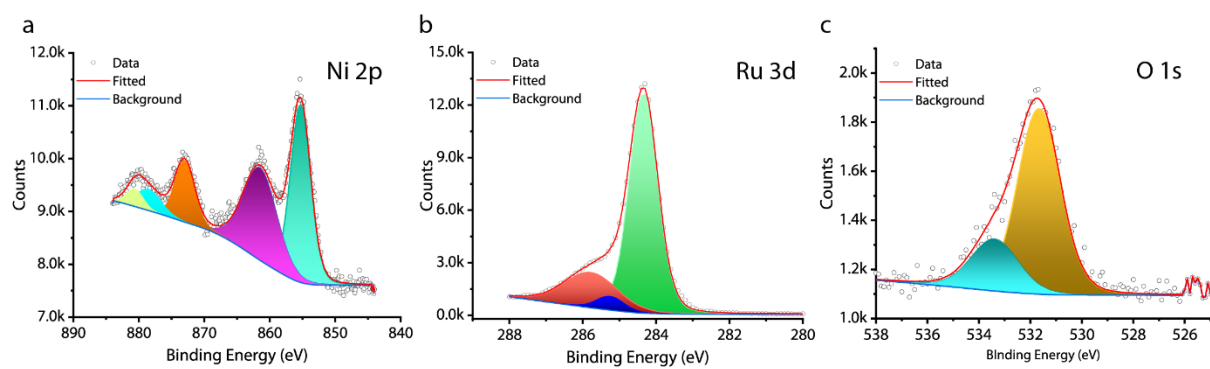

**Figure S1.** Core-level XPS spectra of **1**. (a) Ni 2p. (b) Ru 3d. (c) O 1s.

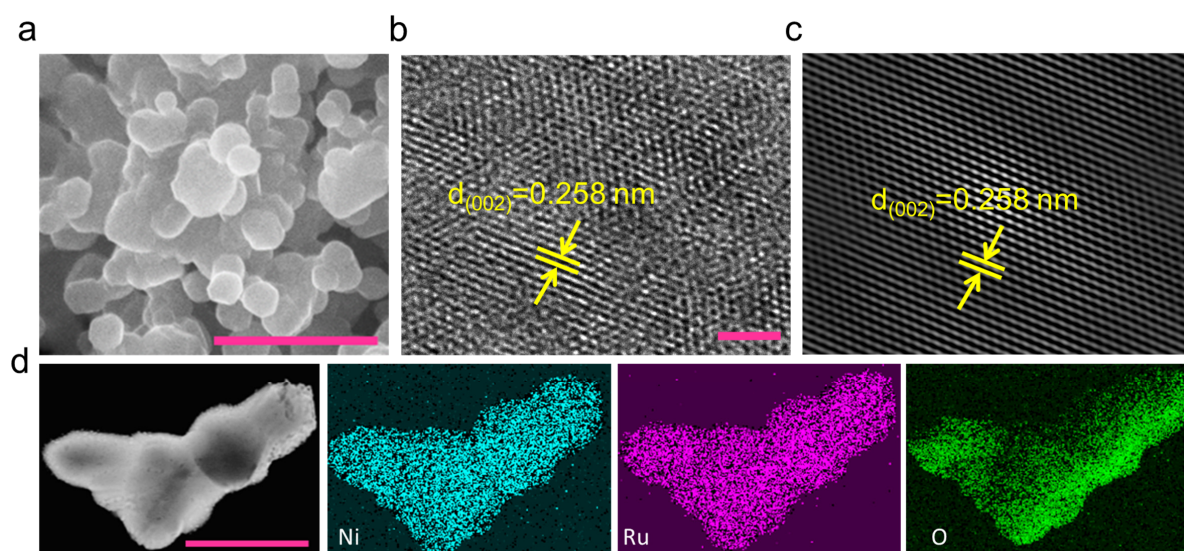

**Figure S2.** Structural and elemental characterizations of **1**. (a) SEM image (scale bar 2 μm). (b) HRTEM image showing lattice fringe distance 0.258 nm corresponding to (002). (scale bar 2 nm). (c) the autocorrelated image corresponding to b. (d) High-angle annular dark-field scanning transmission electron microscopy (HAADF-STEM) and EDS elemental mapping of **1** (scale bar 250 nm).

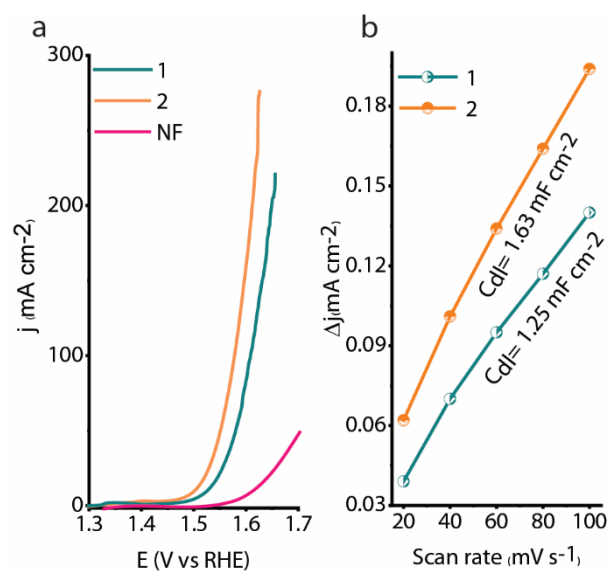

**Figure S3.** Comparative LSV curves of **1**, **2**, and NF. b) Plots of charging current density differences ( $\Delta j$ ) vs. the scan rate for electrodes.

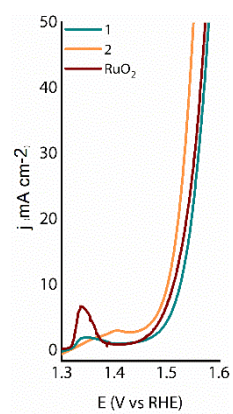

**Figure S4.** Comparative LSV curves of **1**, **2**, and RuO<sub>2</sub>.

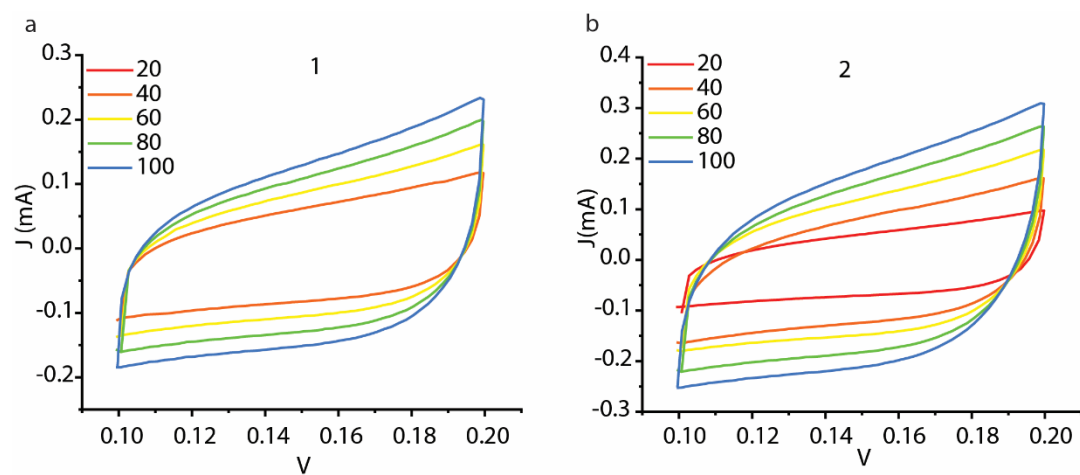

**Figure S5.** Cyclic voltammograms compared at different scan rate (a) 1.(b) 2.

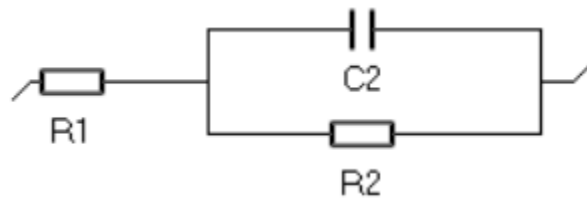

**Figure S6.** Equivalent circuit.

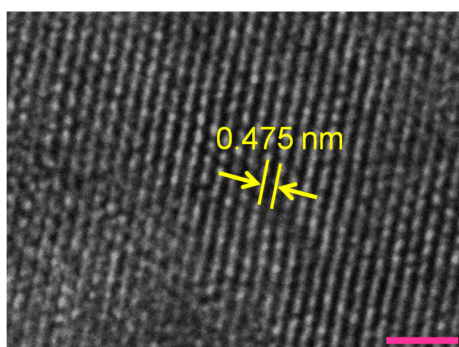

**Figure S7.** HRTEM image after long-term stability (scale bar 2 nm). The lattice fringe distance after long-term stability remains almost same to that of Figure 2b.

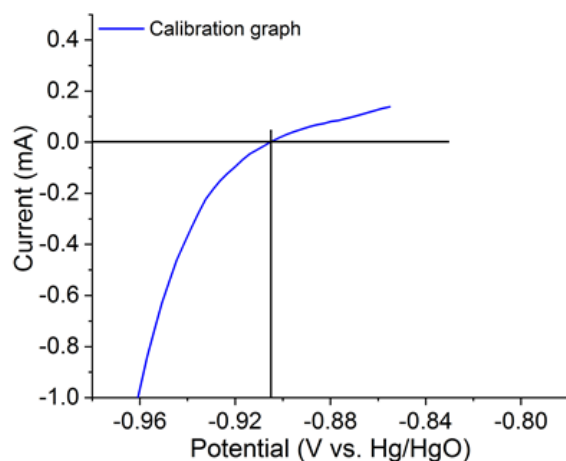

**Figure S8.** Calibration of the Hg/HgO reference electrode. For all measurements, Hg/HgO was used as the reference electrode. The Hg/HgO calibration with respect to the reversible hydrogen electrode (RHE) was performed in the high purity H<sub>2</sub> saturated electrolyte with Pt wire as the working electrode. LSV was run at a rate of 1 mV s<sup>-1</sup>, and potential at zero mA current was taken to be the thermodynamic potential for hydrogen evolution reactions. So, in 1M KOH,  $E(\text{RHE}) = E(\text{Hg/HgO}) + 0.905$

## References:

- 1 Zhu, Y.; Zhou, W.; Chen, Y.; Yu, J.; Liu, M. Shao, Z. A High-Performance Electrocatalyst for Oxygen Evolution Reaction:  $\text{LiCo}_0.8\text{Fe}_{0.2}\text{O}_2$ . *Adv. Mater.* **27**, 7150-7155 (2015). <https://doi.org/10.1002/adma.201503532>
- 2 Lu, Z. *et al.* Electrochemical tuning of layered lithium transition metal oxides for improvement of oxygen evolution reaction. *Nat. Commun.* **5**, 4345 (2014). <https://doi.org/10.1038/ncomms5345>
- 3 Zhu, K.; Wu, T.; Zhu, Y.; Li, X.; Li, M.; Lu, R.; Wang, J.; Zhu, X. Yang, W. Layered Fe-Substituted  $\text{LiNiO}_2$  Electrocatalysts for High-Efficiency Oxygen Evolution Reaction. *ACS Energy Lett.* **2**, 1654-1660 (2017). <https://doi.org/10.1021/acsenergylett.7b00434>
- 4 Gershinsky, Y. Zitoun, D. Direct Chemical Synthesis of Lithium Sub-Stoichiometric Olivine  $\text{Li}_0.7\text{Co}_0.75\text{Fe}_0.25\text{PO}_4$  Coated with Reduced Graphene Oxide as Oxygen Evolution Reaction Electrocatalyst. *ACS Catal.* **8**, 8715-8725 (2018).
- 5 Haber, J. A.; Cai, Y.; Jung, S.; Xiang, C.; Mitrovic, S.; Jin, J.; Bell, A. T. Gregoire, J. M. Discovering Ce-rich oxygen evolution catalysts, from high throughput screening to water electrolysis. *Energ. Environ. Sci.* **7**, 682-688 (2014).
- 6 Trotochaud, L.; Ranney, J. K.; Williams, K. N. Boettcher, S. W. Solution-cast metal oxide thin film electrocatalysts for oxygen evolution. *J. Am. Chem. Soc.* **134**, 17253-17261 (2012).
- 7 Liang, H.; Meng, F.; Cabán-Acevedo, M.; Li, L.; Forticaux, A.; Xiu, L.; Wang, Z. Jin, S. Hydrothermal continuous flow synthesis and exfoliation of NiCo layered double hydroxide nanosheets for enhanced oxygen evolution catalysis. *Nano Lett.* **15**, 1421-1427 (2015).
- 8 Peng, X. *et al.* In situ segregation of cobalt nanoparticles on VN nanosheets via nitriding of  $\text{Co}_2\text{V}_2\text{O}_7$  nanosheets as efficient oxygen evolution reaction electrocatalysts. *Nano Energy* **34**, 1-7 (2017). [https://doi.org:https://doi.org/10.1016/j.nanoen.2017.02.016](https://doi.org/https://doi.org/10.1016/j.nanoen.2017.02.016)
- 9 Li, C.; Han, X.; Cheng, F.; Hu, Y.; Chen, C. Chen, J. Phase and composition controllable synthesis of cobalt manganese spinel nanoparticles towards efficient oxygen electrocatalysis. *Nat. Commun.* **6**, 7345 (2015). <https://doi.org/10.1038/ncomms8345>
- 10 Bao, J. *et al.* Ultrathin spinel-structured nanosheets rich in oxygen deficiencies for enhanced electrocatalytic water oxidation. *Angew. Chem.* **127**, 7507-7512 (2015).
- 11 Lu, Z.; Xu, W.; Zhu, W.; Yang, Q.; Lei, X.; Liu, J.; Li, Y.; Sun, X. Duan, X. Three-dimensional NiFe layered double hydroxide film for high-efficiency oxygen evolution reaction. *Chem. Commun.* **50**, 6479-6482 (2014).
- 12 Suntivich, J.; May, K. J.; Gasteiger, H. A.; Goodenough, J. B. Shao-Horn, Y. A perovskite oxide optimized for oxygen evolution catalysis from molecular orbital principles. *Science* **334**, 1383-1385 (2011).
- 13 Fan, K. *et al.* Nickel–vanadium monolayer double hydroxide for efficient electrochemical water oxidation. *Nat. Commun.* **7**, 1-9 (2016).
- 14 Zhang, Y.; Wang, X.; Luo, F.; Tan, Y.; Zeng, L.; Fang, B. Liu, A. Rock salt type  $\text{NiCo}_2\text{O}_3$  supported on ordered mesoporous carbon as a highly efficient electrocatalyst for oxygen evolution reaction. *Appl. Catal., B* **256**, 117852 (2019). <https://doi.org:https://doi.org/10.1016/j.apcatb.2019.117852>
- 15 Indra, A.; Menezes, P. W.; Sahraie, N. R.; Bergmann, A.; Das, C.; Tallarida, M.; Schmeißer, D.; Strasser, P. Driess, M. Unification of catalytic water oxidation and oxygen reduction reactions: amorphous beat crystalline cobalt iron oxides. *J. Am. Chem. Soc.* **136**, 17530-17536 (2014).
- 16 Chakrapani, K. *et al.* The Role of Composition of Uniform and Highly Dispersed Cobalt Vanadium Iron Spinel Nanocrystals for Oxygen Electrocatalysis. *ACS Catal.* **8**, 1259-1267 (2018). <https://doi.org/10.1021/acscatal.7b03529>
- 17 Li, M.; Zhu, Y.; Wang, H.; Wang, C.; Pinna, N. Lu, X. Ni Strongly Coupled with  $\text{Mo}_2\text{C}$  Encapsulated in Nitrogen-Doped Carbon Nanofibers as Robust Bifunctional Catalyst for Overall Water Splitting. *Adv. Energy Mater.* **9**, 1803185 (2019). <https://doi.org/10.1002/aenm.201803185>

- 18 Grimaud, A.; May, K. J.; Carlton, C. E.; Lee, Y.-L.; Risch, M.; Hong, W. T.; Zhou, J. Shao-Horn, Y. Double perovskites as a family of highly active catalysts for oxygen evolution in alkaline solution. *Nat. Commun.* **4**, 2439 (2013). <https://doi.org:10.1038/ncomms3439>
- 19 Liu, H.; He, Q.; Jiang, H.; Lin, Y.; Zhang, Y.; Habib, M.; Chen, S. Song, L. Electronic structure reconfiguration toward pyrite NiS<sub>2</sub> via engineered heteroatom defect boosting overall water splitting. *ACS nano* **11**, 11574-11583 (2017).
- 20 Fan, K. *et al.* Direct Observation of Structural Evolution of Metal Chalcogenide in Electrocatalytic Water Oxidation. *ACS Nano* **12**, 12369-12379 (2018). <https://doi.org:10.1021/acsnano.8b06312>
- 21 Tiwari, J. N.; Dang, N. K.; Sultan, S.; Thangavel, P.; Jeong, H. Y. Kim, K. S. Multi-heteroatom-doped carbon from waste-yeast biomass for sustained water splitting. *Nat. Sustain.* **3**, 556-563 (2020). <https://doi.org:10.1038/s41893-020-0509-6>
- 22 Qu, M. *et al.* Tailoring the Electronic Structures of the La<sub>2</sub>NiMnO<sub>6</sub> Double Perovskite as Efficient Bifunctional Oxygen Electrocatalysis. *Chem. Mater.* **33**, 2062-2071 (2021). <https://doi.org:10.1021/acs.chemmater.0c04527>
- 23 Sultan, S.; Tiwari, J. N.; Singh, A. N.; Zhumagali, S.; Ha, M.; Myung, C. W.; Thangavel, P. Kim, K. S. Single Atoms and Clusters Based Nanomaterials for Hydrogen Evolution, Oxygen Evolution Reactions, and Full Water Splitting. *Adv. Energy Mater.* **0**, 1900624 (2019). <https://doi.org:10.1002/aenm.201900624>
- 24 Baumung, M.; Schönewald, F.; Erichsen, T.; Volkert, C. A. Risch, M. Influence of particle size on the apparent electrocatalytic activity of LiMn<sub>2</sub>O<sub>4</sub> for oxygen evolution. *Sustain. Energy Fuels* **3**, 2218-2226 (2019). <https://doi.org:10.1039/C8SE00551F>
- 25 Wang, H. *et al.* Self-selective catalyst synthesis for CO<sub>2</sub> reduction. *Joule* **3**, 1927-1936 (2019).
- 26 Tian, Z.; Wang, J.; Liu, S.; Li, Q.; Zeng, G.; Yang, Y. Cui, Y. Na-stabilized Ru-based lithium rich layered oxides with enhanced electrochemical performance for lithium ion batteries. *Electrochim. Acta* **253**, 31-38 (2017). <https://doi.org:https://doi.org/10.1016/j.electacta.2017.09.032>
